# Supplementary material for: Sustained Immunoparalysis in Endotoxin-Tolerized Monocytic Cells
Source: Hindawi journal article supplement (doi:10.1155/2020/8294342), 2020-06-13
Supplement: f1 [file 8294342.f1.pdf]

## Supplementary figures

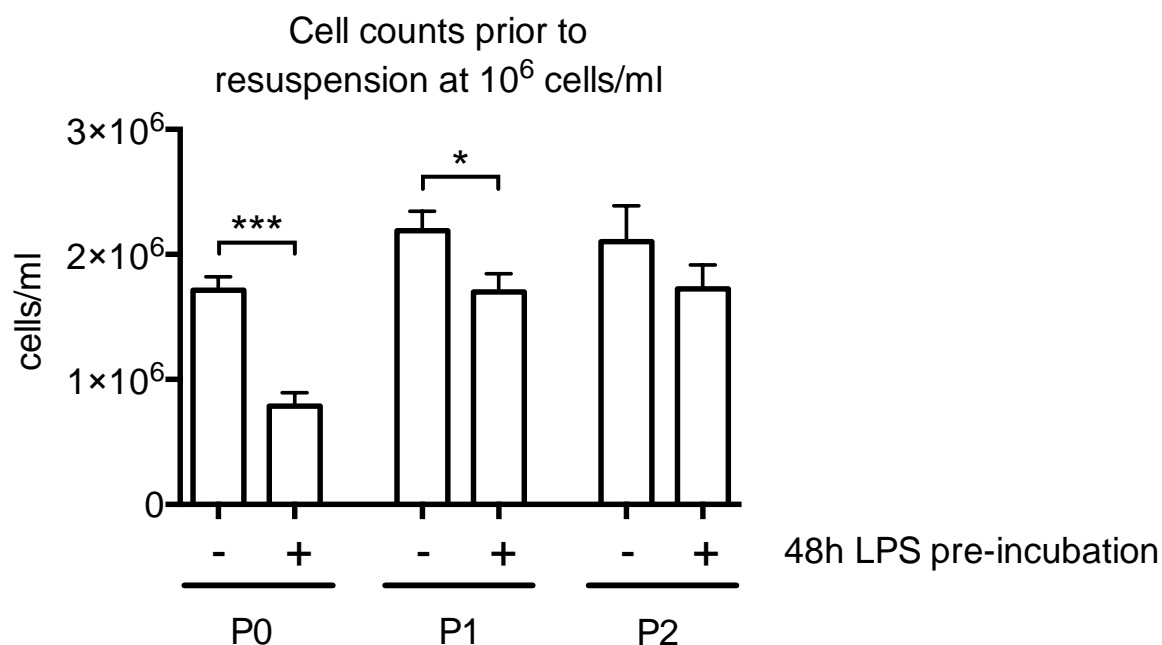

**Suppl. Figure 1.** THP-1 proliferation recovers within 5 days after 48 h of LPS stimulation. LPS or PBS were added to media in P0 for 48 h. Cell density was determined in all treatment groups at the end of P0 (48 h after treatment begin), P1 (96 h after treatment begin) and P2 (144 h after treatment begin) prior to resuspension in fresh media containing no LPS at a density of  $10^6$  cells/ml (A) (Mean  $\pm$  SEM,  $n = 8-12$ ; \*  $p < 0.05$ ). At each time point statistical differences between PBS and LPS treated cells were calculated with t-test (\*  $p < 0.05$ ).

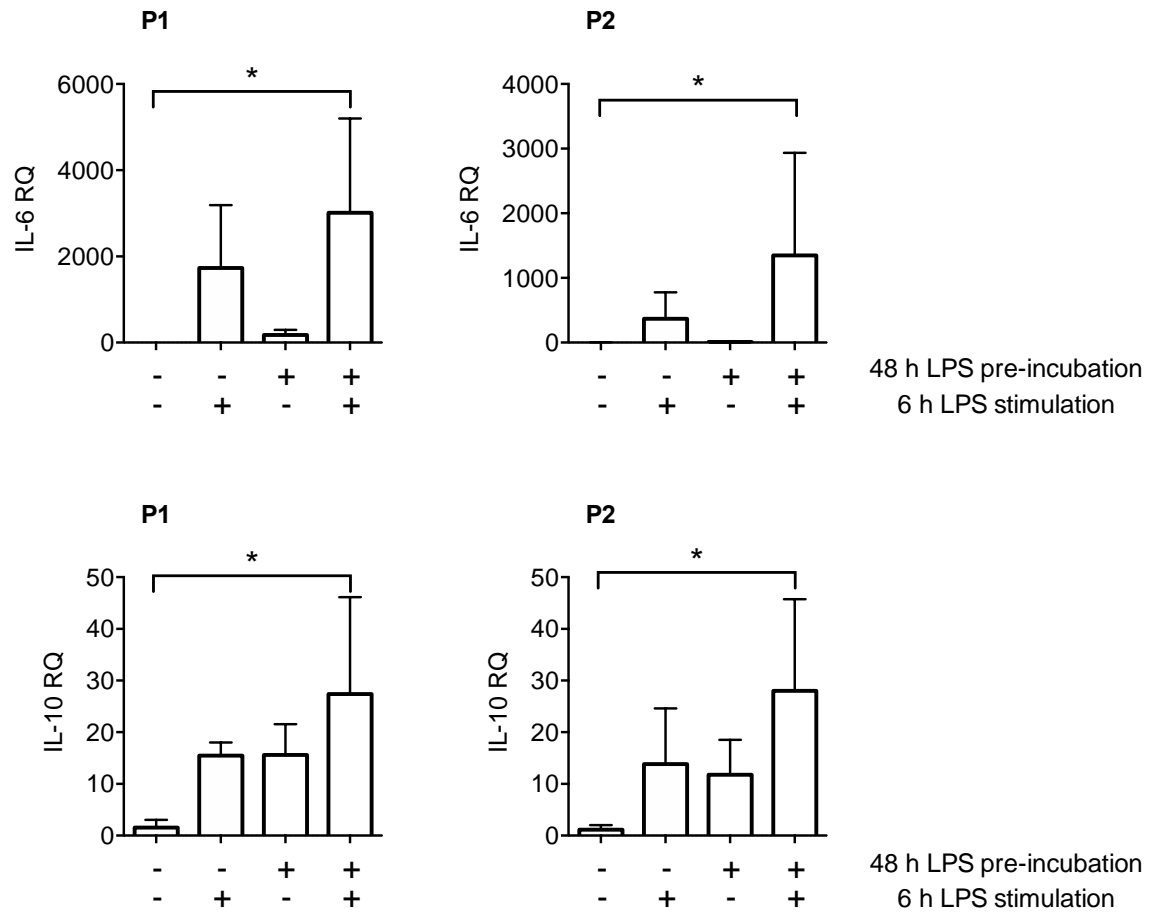

**Suppl. Figure 2.** LPS tolerized (1  $\mu\text{g/ml}$ ) THP-1 monocytes demonstrate sustained IL-6 and IL-10 cytokine mRNA and protein alterations upon LPS restimulation (1  $\mu\text{g/ml}$ ) compared to previously untreated cells. mRNA-transcription of IL-6 and IL-10 was measured in passage (P) 1 and 2 after 48 h preincubation followed by resting durations of 0 h (P1) and 48 h (P2). Mean  $\pm$  SD; n = 3.
